# Supplementary material
Source: PubMed Central journal article supplement (PMC5918688)

Supplementary Figure 1 | Uncropped gel images from PAGE experiments

Figure 2b

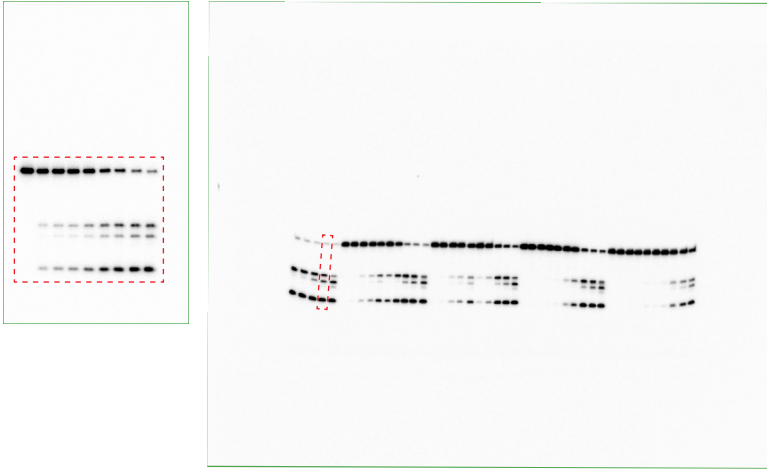

Extended Data Figure 1a

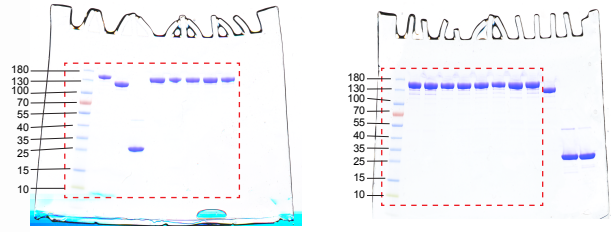

Extended Data Figure 1b

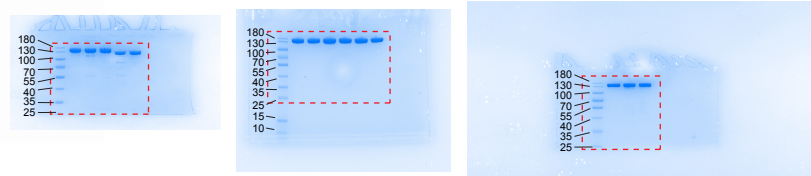

Extended Data Figure 1c

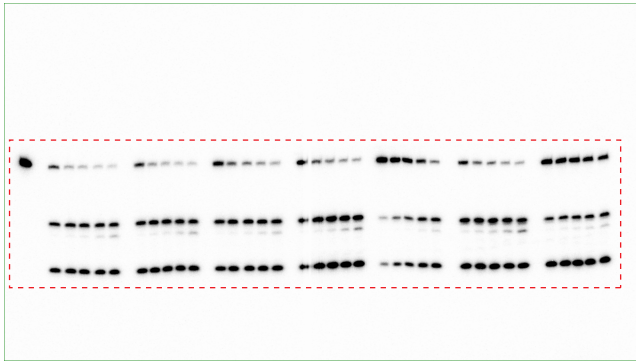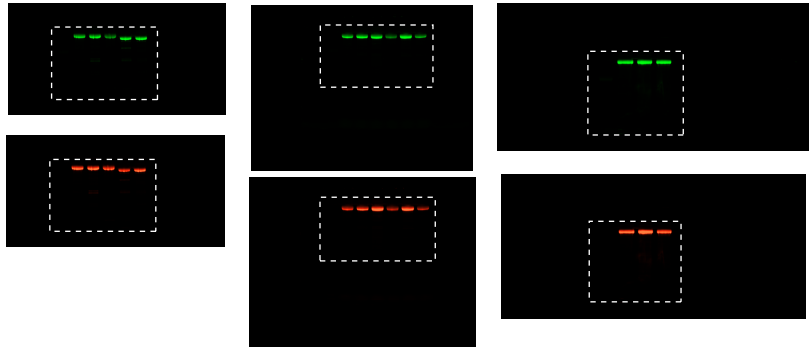

Extended Data Figure 1d

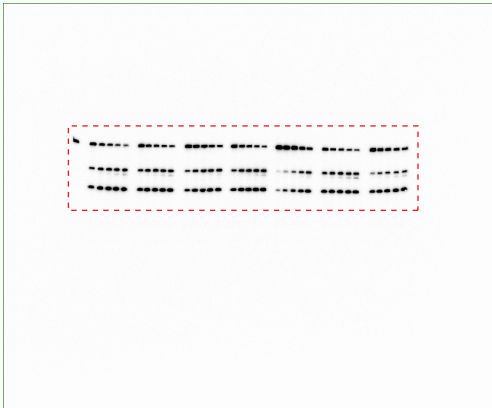

Extended Data Figure 1e

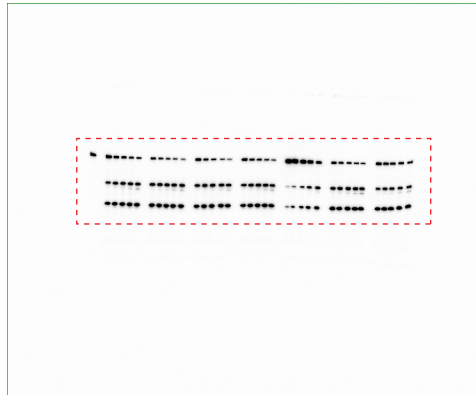

Extended Data Figure 1f

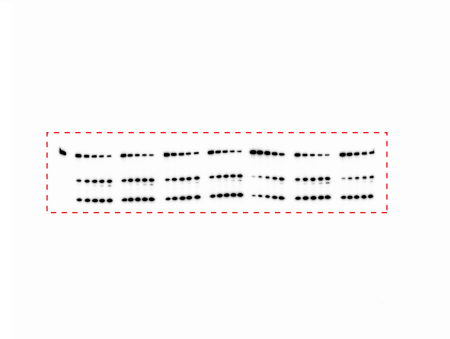

Extended Data Figure 6c

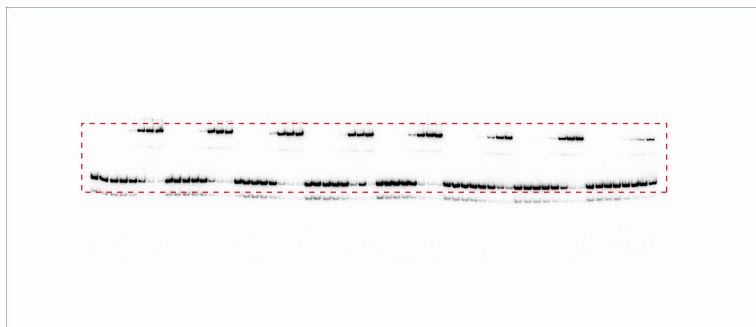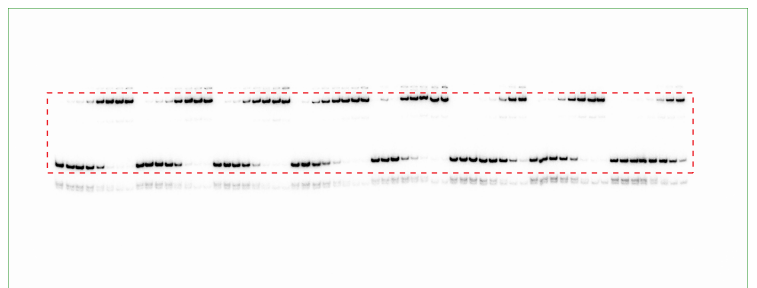

Supplement: NIHMS905915-supplement-Supp_figure_1.pdf [file NIHMS905915-supplement-Supp_figure_1.pdf]
